# Supplementary material for: Relationship between the Well-Being of Elderly Men and Cohabiting with Women Who Have Had Experience as a Health Promotion Volunteer in Japan: A Cross-Sectional Study
Source: Int J Environ Res Public Health. 2018 Dec 27;16(1):65. doi: 10.3390/ijerph16010065 (PMC6338992; doi:10.3390/ijerph16010065)

## Supplementary Material

# Relationship between the Well-Being of Elderly Men and Cohabiting with Women Who Have Had Experience as a Health Promotion Volunteer in Japan: A Cross-Sectional Study

Haruhiko Imamura <sup>1,\*</sup>, Hideki Nakamura <sup>2</sup> and Yuji Nishiwaki <sup>1</sup>

**Table S1.** Association between cohabiting women's experience as a health promotion volunteer and low functional capacity (12 points or less) in the study population ( $n = 2247$ ).

| Experience as Health Promotion Volunteer of Cohabiting Woman | Outcome / Study Population (%) |   |      |         | Model 1 <sup>a</sup>     |       |   |       |                 | Model 2 <sup>b</sup> |       |   |       |                 | Model 3 <sup>c</sup> |       |   |       |                 |
|--------------------------------------------------------------|--------------------------------|---|------|---------|--------------------------|-------|---|-------|-----------------|----------------------|-------|---|-------|-----------------|----------------------|-------|---|-------|-----------------|
|                                                              |                                |   |      |         | PR (95% CI) <sup>d</sup> |       |   |       | <i>p</i> -Value | PR (95% CI)          |       |   |       | <i>p</i> -Value | PR (95% CI)          |       |   |       | <i>p</i> -Value |
| Presence of experience                                       |                                |   |      |         |                          |       |   |       |                 |                      |       |   |       |                 |                      |       |   |       |                 |
| Not experienced                                              | 457                            | / | 885  | (51.6%) | 1.00                     |       |   |       |                 | 1.00                 |       |   |       |                 | 1.00                 |       |   |       |                 |
| Experienced                                                  | 656                            | / | 1362 | (48.2%) | 0.91                     | (0.84 | – | 0.99) | 0.04            | 0.92                 | (0.85 | – | 1.01) | 0.07            | 0.94                 | (0.87 | – | 1.02) | 0.14            |
| Years since experience                                       |                                |   |      |         |                          |       |   |       |                 |                      |       |   |       |                 |                      |       |   |       |                 |
| Not experienced                                              | 457                            | / | 885  | (51.6%) | 1.00                     |       |   |       |                 | 1.00                 |       |   |       |                 | 1.00                 |       |   |       |                 |
| Experienced: 0–19 years                                      | 268                            | / | 572  | (46.9%) | 0.94                     | (0.84 | – | 1.04) | 0.23            | 0.95                 | (0.85 | – | 1.06) | 0.37            | 0.97                 | (0.87 | – | 1.07) | 0.52            |
| : 20–39 years                                                | 301                            | / | 639  | (47.1%) | 0.87                     | (0.78 | – | 0.97) | 0.01            | 0.88                 | (0.79 | – | 0.98) | 0.02            | 0.90                 | (0.81 | – | 1.00) | 0.04            |
| : 40 years or more                                           | 52                             | / | 85   | (61.2%) | 1.05                     | (0.87 | – | 1.27) | 0.58            | 1.07                 | (0.88 | – | 1.29) | 0.50            | 1.09                 | (0.90 | – | 1.31) | 0.37            |
| : no response                                                | 35                             | / | 66   | (53.0%) | 0.97                     | (0.77 | – | 1.23) | 0.83            | 0.95                 | (0.75 | – | 1.19) | 0.64            | 0.92                 | (0.74 | – | 1.16) | 0.50            |
| Leadership role                                              |                                |   |      |         |                          |       |   |       |                 |                      |       |   |       |                 |                      |       |   |       |                 |
| Not experienced                                              | 457                            | / | 885  | (51.6%) | 1.00                     |       |   |       |                 | 1.00                 |       |   |       |                 | 1.00                 |       |   |       |                 |
| Experienced: no                                              | 474                            | / | 985  | (48.1%) | 0.92                     | (0.84 | – | 1.01) | 0.07            | 0.93                 | (0.85 | – | 1.01) | 0.10            | 0.94                 | (0.86 | – | 1.03) | 0.17            |
| : yes                                                        | 128                            | / | 267  | (47.9%) | 0.91                     | (0.79 | – | 1.05) | 0.19            | 0.94                 | (0.82 | – | 1.08) | 0.41            | 0.97                 | (0.84 | – | 1.11) | 0.62            |
| : no response                                                | 54                             | / | 110  | (49.1%) | 0.88                     | (0.72 | – | 1.08) | 0.21            | 0.86                 | (0.71 | – | 1.05) | 0.15            | 0.89                 | (0.73 | – | 1.08) | 0.23            |
| Satisfaction with the experience                             |                                |   |      |         |                          |       |   |       |                 |                      |       |   |       |                 |                      |       |   |       |                 |
| Not experienced                                              | 457                            | / | 885  | (51.6%) | 1.00                     |       |   |       |                 | 1.00                 |       |   |       |                 | 1.00                 |       |   |       |                 |
| Experienced: low                                             | 80                             | / | 152  | (52.6%) | 1.02                     | (0.86 | – | 1.20) | 0.84            | 1.02                 | (0.87 | – | 1.19) | 0.85            | 1.00                 | (0.86 | – | 1.17) | 0.97            |
| : medium                                                     | 413                            | / | 842  | (49.0%) | 0.93                     | (0.85 | – | 1.02) | 0.13            | 0.94                 | (0.86 | – | 1.04) | 0.22            | 0.96                 | (0.88 | – | 1.05) | 0.39            |
| : high                                                       | 138                            | / | 311  | (44.4%) | 0.84                     | (0.73 | – | 0.96) | 0.01            | 0.85                 | (0.74 | – | 0.98) | 0.03            | 0.88                 | (0.76 | – | 1.01) | 0.06            |

|               |    |   |    |         |      |       |   |       |      |      |       |   |       |      |      |       |   |       |      |
|---------------|----|---|----|---------|------|-------|---|-------|------|------|-------|---|-------|------|------|-------|---|-------|------|
| : no response | 25 | / | 57 | (43.9%) | 0.81 | (0.60 | – | 1.10) | 0.18 | 0.80 | (0.60 | – | 1.07) | 0.14 | 0.80 | (0.60 | – | 1.07) | 0.13 |
|---------------|----|---|----|---------|------|-------|---|-------|------|------|-------|---|-------|------|------|-------|---|-------|------|

PR, prevalence ratio; CI, confidence interval. \* This table shows the results for low functional capacity when the cutoff value was changed to 12 points or less. <sup>a</sup> Model 1. Adjusted for age (continuous). <sup>b</sup> Model 2. Adjusted for age (continuous), educational attainment, and equivalent household income. <sup>c</sup> Model 3. Adjusted for age (continuous), educational attainment, equivalent household income, history of major diseases, exercise habits, consciousness of healthy eating habits, current drinking, and current smoking. <sup>d</sup> Adjusted PR and 95% CI were estimated by modified Poisson regression analysis.

**Table S2.** Associations between cohabiting women's experience as a health promotion volunteer and both outcomes in the study population when narrowing the age of cohabiting women.

| Experience as Health Promotion Volunteer<br>of Cohabiting Woman | [Model 3 for Outcome 1] <sup>a</sup><br>Low Functional Capacity<br>( <i>n</i> = 1928) |       |   |                 |      | [Model 3 for Outcome 2]<br>Depressive Symptoms<br>( <i>n</i> = 1986) |       |   |                 |      |
|-----------------------------------------------------------------|---------------------------------------------------------------------------------------|-------|---|-----------------|------|----------------------------------------------------------------------|-------|---|-----------------|------|
|                                                                 | PR (95% CI) <sup>b</sup>                                                              |       |   | <i>p</i> -Value |      | PR (95% CI)                                                          |       |   | <i>p</i> -Value |      |
| <b>Presence of experience</b>                                   |                                                                                       |       |   |                 |      |                                                                      |       |   |                 |      |
| Not experienced                                                 | 1.00                                                                                  |       |   |                 |      | 1.00                                                                 |       |   |                 |      |
| Experienced                                                     | 1.03                                                                                  | (0.86 | – | 1.23)           | 0.75 | 0.86                                                                 | (0.74 | – | 1.01)           | 0.06 |
| <b>Years since experience</b>                                   |                                                                                       |       |   |                 |      |                                                                      |       |   |                 |      |
| Not experienced                                                 | 1.00                                                                                  |       |   |                 |      | 1.00                                                                 |       |   |                 |      |
| Experienced: 0–19 years                                         | 1.13                                                                                  | (0.89 | – | 1.42)           | 0.31 | 0.82                                                                 | (0.66 | – | 1.02)           | 0.08 |
| : 20–39 years                                                   | 1.02                                                                                  | (0.82 | – | 1.26)           | 0.89 | 0.92                                                                 | (0.76 | – | 1.11)           | 0.37 |
| : 40 years or more                                              | 0.71                                                                                  | (0.40 | – | 1.23)           | 0.22 | 0.83                                                                 | (0.55 | – | 1.28)           | 0.41 |
| : no response                                                   | 0.87                                                                                  | (0.57 | – | 1.35)           | 0.54 | 0.73                                                                 | (0.47 | – | 1.15)           | 0.18 |
| <b>Leadership role</b>                                          |                                                                                       |       |   |                 |      |                                                                      |       |   |                 |      |
| Not experienced                                                 | 1.00                                                                                  |       |   |                 |      | 1.00                                                                 |       |   |                 |      |
| Experienced: no                                                 | 1.07                                                                                  | (0.89 | – | 1.29)           | 0.49 | 0.86                                                                 | (0.72 | – | 1.02)           | 0.08 |
| : yes                                                           | 0.95                                                                                  | (0.68 | – | 1.33)           | 0.76 | 0.92                                                                 | (0.69 | – | 1.21)           | 0.54 |
| : no response                                                   | 0.86                                                                                  | (0.57 | – | 1.31)           | 0.48 | 0.78                                                                 | (0.54 | – | 1.15)           | 0.21 |
| <b>Satisfaction with the experience</b>                         |                                                                                       |       |   |                 |      |                                                                      |       |   |                 |      |
| Not experienced                                                 | 1.00                                                                                  |       |   |                 |      | 1.00                                                                 |       |   |                 |      |
| Experienced: low                                                | 1.31                                                                                  | (0.97 | – | 1.77)           | 0.08 | 0.79                                                                 | (0.57 | – | 1.10)           | 0.17 |
| : medium                                                        | 1.08                                                                                  | (0.89 | – | 1.31)           | 0.45 | 0.89                                                                 | (0.75 | – | 1.07)           | 0.22 |
| : high                                                          | 0.81                                                                                  | (0.59 | – | 1.12)           | 0.21 | 0.83                                                                 | (0.64 | – | 1.07)           | 0.15 |
| : no response                                                   | 0.73                                                                                  | (0.42 | – | 1.27)           | 0.27 | 0.80                                                                 | (0.49 | – | 1.31)           | 0.37 |

PR, prevalence ratio; CI, confidence interval. \* This table shows the results for low functional capacity and depressive symptoms when narrowing the age of cohabiting women to more than plus or minus 5 years old in Model 3. <sup>a</sup> Model 3. Adjusted for age (continuous), educational attainment, equivalent household income, history of major diseases, exercise habits, consciousness of healthy eating habits, current drinking, and current smoking. <sup>b</sup> Adjusted PR and 95% CI were estimated by modified Poisson regression analysis.

**Table S3.** Associations between cohabiting women's experience as a health promotion volunteer and both outcomes in the study population when not limiting the age of cohabiting women.

| Experience as Health Promotion Volunteer<br>of Cohabiting Woman | [Model 3 for Outcome 1] <sup>a</sup><br>Low Functional Capacity<br>( <i>n</i> = 2261) |       |   |                 |      | [Model 3 for Outcome 2]<br>Depressive Symptoms<br>( <i>n</i> = 2330) |       |   |                 |      |
|-----------------------------------------------------------------|---------------------------------------------------------------------------------------|-------|---|-----------------|------|----------------------------------------------------------------------|-------|---|-----------------|------|
|                                                                 | PR (95% CI) <sup>b</sup>                                                              |       |   | <i>p</i> -Value |      | PR (95% CI)                                                          |       |   | <i>p</i> -Value |      |
| <b>Presence of experience</b>                                   |                                                                                       |       |   |                 |      |                                                                      |       |   |                 |      |
| Not experienced                                                 | 1.00                                                                                  |       |   |                 |      | 1.00                                                                 |       |   |                 |      |
| Experienced                                                     | 1.03                                                                                  | (0.87 | – | 1.22)           | 0.72 | 0.85                                                                 | (0.74 | – | 0.98)           | 0.03 |
| <b>Years since experience</b>                                   |                                                                                       |       |   |                 |      |                                                                      |       |   |                 |      |
| Not experienced                                                 | 1.00                                                                                  |       |   |                 |      | 1.00                                                                 |       |   |                 |      |
| Experienced: 0–19 years                                         | 1.13                                                                                  | (0.91 | – | 1.40)           | 0.28 | 0.82                                                                 | (0.67 | – | 1.00)           | 0.05 |
| : 20–39 years                                                   | 1.01                                                                                  | (0.83 | – | 1.24)           | 0.90 | 0.90                                                                 | (0.76 | – | 1.07)           | 0.23 |
| : 40 years or more                                              | 0.87                                                                                  | (0.56 | – | 1.36)           | 0.54 | 0.87                                                                 | (0.61 | – | 1.24)           | 0.44 |
| : no response                                                   | 0.78                                                                                  | (0.50 | – | 1.22)           | 0.27 | 0.64                                                                 | (0.40 | – | 1.01)           | 0.06 |
| <b>Leadership role</b>                                          |                                                                                       |       |   |                 |      |                                                                      |       |   |                 |      |
| Not experienced                                                 | 1.00                                                                                  |       |   |                 |      | 1.00                                                                 |       |   |                 |      |
| Experienced: no                                                 | 1.07                                                                                  | (0.89 | – | 1.27)           | 0.48 | 0.86                                                                 | (0.74 | – | 1.01)           | 0.06 |
| : yes                                                           | 0.91                                                                                  | (0.67 | – | 1.23)           | 0.54 | 0.85                                                                 | (0.66 | – | 1.09)           | 0.20 |
| : no response                                                   | 0.99                                                                                  | (0.69 | – | 1.42)           | 0.95 | 0.75                                                                 | (0.54 | – | 1.06)           | 0.10 |
| <b>Satisfaction with the experience</b>                         |                                                                                       |       |   |                 |      |                                                                      |       |   |                 |      |
| Not experienced                                                 | 1.00                                                                                  |       |   |                 |      | 1.00                                                                 |       |   |                 |      |
| Experienced: low                                                | 1.33                                                                                  | (1.00 | – | 1.77)           | 0.05 | 0.86                                                                 | (0.65 | – | 1.15)           | 0.31 |
| : medium                                                        | 1.08                                                                                  | (0.90 | – | 1.30)           | 0.39 | 0.88                                                                 | (0.75 | – | 1.04)           | 0.14 |
| : high                                                          | 0.81                                                                                  | (0.60 | – | 1.10)           | 0.18 | 0.79                                                                 | (0.62 | – | 1.00)           | 0.06 |
| : no response                                                   | 0.62                                                                                  | (0.35 | – | 1.11)           | 0.11 | 0.68                                                                 | (0.41 | – | 1.13)           | 0.14 |

PR, prevalence ratio; CI, confidence interval. \* This table shows the results for low functional capacity and depressive symptoms when not limiting the age of cohabiting women in Model 3. <sup>a</sup> Model 3. Adjusted for age (continuous), educational attainment, equivalent household income, history of major diseases, exercise habits, consciousness of healthy eating habits, current drinking, and current smoking. <sup>b</sup> Adjusted PR and 95% CI were estimated by modified Poisson regression analysis.

**Table S4.** Associations between cohabiting women's experience as a health promotion volunteer and depressive symptoms in the study population when limiting the health status of cohabiting women to not having depressive symptoms ( $n = 1670$ ).

| Experience as Health Promotion Volunteer<br>of Cohabiting Woman | Outcome / Study Population (%) |   |      |         | Model 3 <sup>a</sup> |       |   |                 |      |
|-----------------------------------------------------------------|--------------------------------|---|------|---------|----------------------|-------|---|-----------------|------|
|                                                                 |                                |   |      |         | PR (95% CI)          |       |   | <i>p</i> -Value |      |
| <b>Presence of experience</b>                                   |                                |   |      |         |                      |       |   |                 |      |
| Not experienced                                                 | 122                            | / | 629  | (19.4%) | 1.00                 |       |   |                 |      |
| Experienced                                                     | 183                            | / | 1041 | (17.6%) | 0.86                 | (0.71 | – | 1.05)           | 0.15 |
| <b>Years since experience</b>                                   |                                |   |      |         |                      |       |   |                 |      |
| Not experienced                                                 | 122                            | / | 629  | (19.4%) | 1.00                 |       |   |                 |      |
| Experienced: 0–19 years                                         | 74                             | / | 459  | (16.1%) | 0.88                 | (0.68 | – | 1.14)           | 0.33 |
| : 20–39 years                                                   | 90                             | / | 485  | (18.6%) | 0.87                 | (0.68 | – | 1.10)           | 0.24 |
| : 40 years or more                                              | 14                             | / | 64   | (21.9%) | 0.90                 | (0.54 | – | 1.51)           | 0.69 |
| : no response                                                   | 5                              | / | 33   | (15.2%) | 0.60                 | (0.31 | – | 1.18)           | 0.14 |
| <b>Leadership role</b>                                          |                                |   |      |         |                      |       |   |                 |      |
| Not experienced                                                 | 122                            | / | 629  | (19.4%) | 1.00                 |       |   |                 |      |
| Experienced: no                                                 | 132                            | / | 749  | (17.6%) | 0.86                 | (0.70 | – | 1.07)           | 0.18 |
| : yes                                                           | 40                             | / | 230  | (17.4%) | 0.89                 | (0.64 | – | 1.23)           | 0.47 |
| : no response                                                   | 11                             | / | 62   | (17.7%) | 0.80                 | (0.46 | – | 1.37)           | 0.41 |
| <b>Satisfaction with the experience</b>                         |                                |   |      |         |                      |       |   |                 |      |
| Not experienced                                                 | 122                            | / | 629  | (19.4%) | 1.00                 |       |   |                 |      |
| Experienced: low                                                | 17                             | / | 101  | (16.8%) | 0.77                 | (0.50 | – | 1.19)           | 0.23 |
| : medium                                                        | 118                            | / | 652  | (18.1%) | 0.89                 | (0.72 | – | 1.12)           | 0.32 |
| : high                                                          | 44                             | / | 260  | (16.9%) | 0.86                 | (0.63 | – | 1.16)           | 0.32 |
| : no response                                                   | 4                              | / | 28   | (14.3%) | 0.64                 | (0.30 | – | 1.39)           | 0.26 |

PR, prevalence ratio; CI, confidence interval. <sup>a</sup> This table shows the results for depressive symptoms when limiting the health status of cohabiting women to not having depressive symptoms in Model 3. <sup>a</sup> Model 3. Adjusted for age (continuous), educational attainment, equivalent household income, history of major diseases, exercise habits, consciousness of healthy eating habits, current drinking, and current smoking. <sup>b</sup> Adjusted PR and 95% CI were estimated by modified Poisson regression analysis.

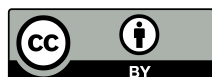

Supplement: Supplementary file 1 [file ijerph-16-00065-s001.pdf]
